# Supplementary material for: A molecular ruthenium catalyst with water-oxidation activity comparable to that of photosystem II
Source: Springer Nature journal article supplement (doi:10.1038/nchem.1301), 2012-03-23
Supplement: 41557_2012_BFnchem1301_MOESM1_ESM.mol [file 41557_2012_BFnchem1301_MOESM1_ESM.mol]

  ChemDraw03071213342D

 39 41  0  0  0  0  0  0  0  0999 V2000
   -1.6449    2.0295    0.0000 C   0  0  0  0  0  0  0  0  0  0  0  0
   -2.0588    1.3166    0.0000 C   0  0  0  0  0  0  0  0  0  0  0  0
   -1.6473    0.6012    0.0000 C   0  0  0  0  0  0  0  0  0  0  0  0
   -0.8218    0.5988    0.0000 N   0  0  0  0  0  0  0  0  0  0  0  0
   -0.4079    1.3118    0.0000 C   0  0  0  0  0  0  0  0  0  0  0  0
   -0.8195    2.0272    0.0000 C   0  0  0  0  0  0  0  0  0  0  0  0
    0.4127    1.3094    0.0000 C   0  0  0  0  0  0  0  0  0  0  0  0
    0.8242    0.5940    0.0000 N   0  0  0  0  0  0  0  0  0  0  0  0
    1.6497    0.5940    0.0000 C   0  0  0  0  0  0  0  0  0  0  0  0
    2.0636    1.3070    0.0000 C   0  0  0  0  0  0  0  0  0  0  0  0
    1.6521    2.0224    0.0000 C   0  0  0  0  0  0  0  0  0  0  0  0
    0.8266    2.0248    0.0000 C   0  0  0  0  0  0  0  0  0  0  0  0
    2.0588   -0.1190    0.0000 C   0  0  0  0  0  0  0  0  0  0  0  0
   -2.0612   -0.1118    0.0000 C   0  0  0  0  0  0  0  0  0  0  0  0
   -2.8818   -0.1094    0.0000 O   0  0  0  0  0  0  0  0  0  0  0  0
   -1.6497   -0.8248    0.0000 O   0  5  0  0  0  0  0  0  0  0  0  0
    1.6473   -0.8296    0.0000 O   0  5  0  0  0  0  0  0  0  0  0  0
    2.8818   -0.1214    0.0000 O   0  0  0  0  0  0  0  0  0  0  0  0
    0.0610   -2.1814    0.0000 N   0  0  0  0  0  0  0  0  0  0  0  0
    0.7930   -2.5589    0.0000 C   0  0  0  0  0  0  0  0  0  0  0  0
    0.8300   -3.3836    0.0000 C   0  0  0  0  0  0  0  0  0  0  0  0
    0.1373   -3.8283    0.0000 C   0  0  0  0  0  0  0  0  0  0  0  0
   -0.5970   -3.4508    0.0000 C   0  0  0  0  0  0  0  0  0  0  0  0
   -0.6340   -2.6261    0.0000 C   0  0  0  0  0  0  0  0  0  0  0  0
    0.1742   -4.6506    0.0000 C   0  0  0  0  0  0  0  0  0  0  0  0
   -0.5469   -5.1011    0.0000 C   0  0  0  0  0  0  0  0  0  0  0  0
   -1.2821   -4.6973    0.0000 C   0  0  0  0  0  0  0  0  0  0  0  0
   -1.3071   -3.8721    0.0000 C   0  0  0  0  0  0  0  0  0  0  0  0
    0.0538    2.2209    0.0000 N   0  0  0  0  0  0  0  0  0  0  0  0
    0.7644    2.6396    0.0000 C   0  0  0  0  0  0  0  0  0  0  0  0
    0.7572    3.4627    0.0000 C   0  0  0  0  0  0  0  0  0  0  0  0
    0.0395    3.8694    0.0000 C   0  0  0  0  0  0  0  0  0  0  0  0
   -0.6711    3.4531    0.0000 C   0  0  0  0  0  0  0  0  0  0  0  0
   -0.6639    2.6277    0.0000 C   0  0  0  0  0  0  0  0  0  0  0  0
    0.0323    4.6925    0.0000 C   0  0  0  0  0  0  0  0  0  0  0  0
    1.4684    3.8694    0.0000 C   0  0  0  0  0  0  0  0  0  0  0  0
    1.4684    4.6944    0.0000 C   0  0  0  0  0  0  0  0  0  0  0  0
    0.7572    5.1011    0.0000 C   0  0  0  0  0  0  0  0  0  0  0  0
    0.0323   -0.2889    0.0000 Ru  0  2  0  0  0  0  0  0  0  0  0  0
  1  2  2  0      
  2  3  1  0      
  3  4  2  0      
  4  5  1  0      
  5  6  2  0      
  6  1  1  0      
  5  7  1  0      
  7  8  2  0      
  8  9  1  0      
  9 10  2  0      
 10 11  1  0      
 11 12  2  0      
 12  7  1  0      
  9 13  1  0      
  3 14  1  0      
 14 15  2  0      
 14 16  1  0      
 13 17  1  0      
 13 18  2  0      
 19 20  2  0      
 20 21  1  0      
 21 22  2  0      
 22 23  1  0      
 23 24  2  0      
 24 19  1  0      
 22 25  1  0      
 25 26  2  0      
 26 27  1  0      
 27 28  2  0      
 28 23  1  0      
 29 30  2  0      
 30 31  1  0      
 31 32  2  0      
 32 33  1  0      
 33 34  2  0      
 34 29  1  0      
 32 35  1  0      
 31 36  1  0      
 36 37  2  0      
 37 38  1  0      
 38 35  2  0      
M  CHG  3  16  -1  17  -1  39   2
M  END
